# Supplementary material for: Natural coal gangue as a stable catalyst to activate persulfate: tetracycline hydrochloride degradation and its explored mechanism
Source: Royal Society of Chemistry journal article supplement (doi:10.1039/d2nj04738a), 2023-01-01
Supplement: d2nj04738a1.pdf [file d2nj04738a1.pdf]

## *Supplementary Information*

### **Natural coal gangue as a stable catalyst to activate persulfate: Tetracycline hydrochloride degradation and explored mechanism**

Pengfei Zhang, Rongbo Zhao, Zhiliang Liu, Yiguo Su\*, Chunfang Du\*

*College of Chemistry and Chemical Engineering, Inner Mongolia University, Hohhot, Inner Mongolia, 010021, P.*

*R. China.*

*Corresponding author E-mail: cedchf@imu.edu.cn (C. Du\*), cesyg@imu.edu.cn (Y. Su\*); Fax: +86-471-4994375;*

*Tel: +86-471-4994375.*

**Table. S1.** Chemical compositions of raw CG

| Elements | Content (%) | Elements | Content (%) |
|----------|-------------|----------|-------------|
| O        | 42.00       | Zr       | 0.06        |
| Si       | 23.48       | Cl       | 0.05        |
| Al       | 22.52       | P        | 0.05        |
| Fe       | 5.69        | Sr       | 0.02        |
| S        | 4.29        | Pb       | 0.01        |
| Ti       | 1.06        | Ga       | 0.009       |
| Ca       | 0.49        | Y        | 0.006       |
| K        | 0.19        | Nb       | 0.005       |

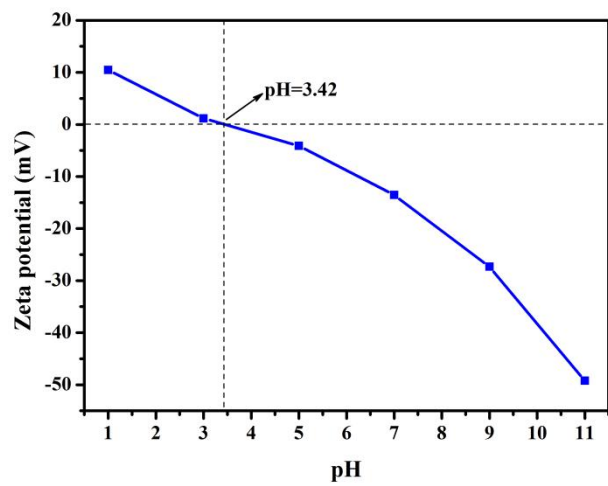

**Fig. S1.** The Zeta potentials of CG at different pH value

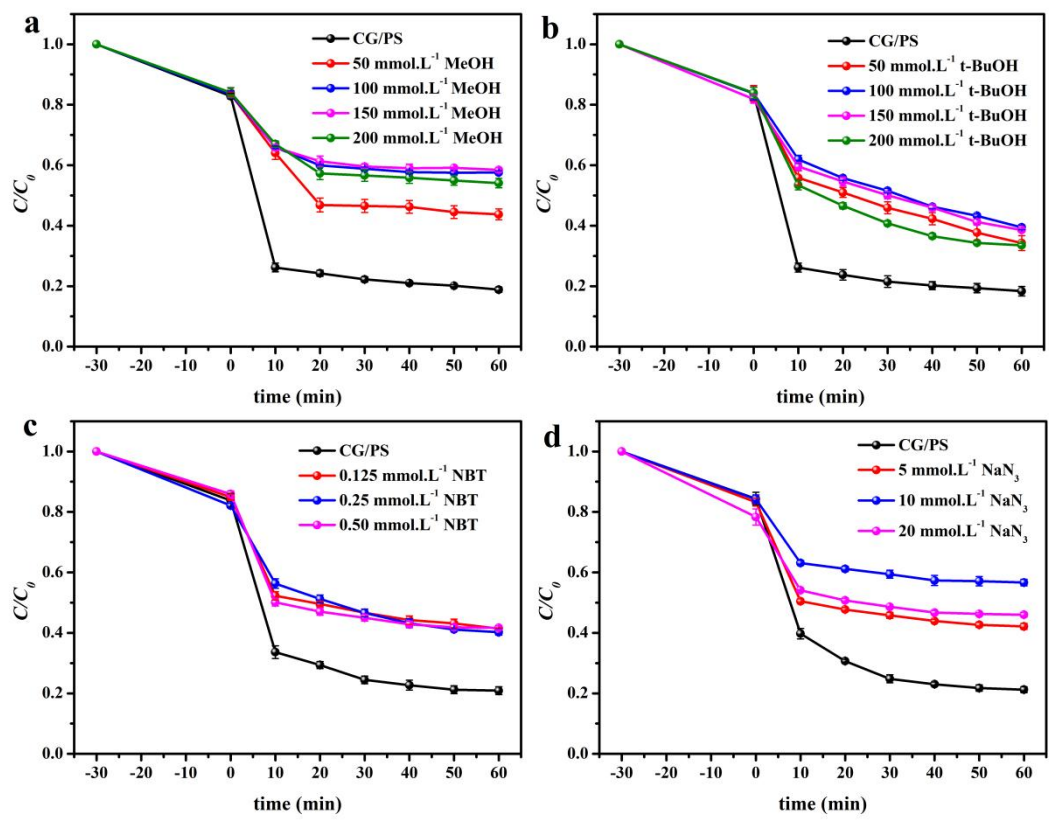

**Fig. S2.** (a-d) The effects of various scavengers with different concentrations on the degradation efficiency of TC

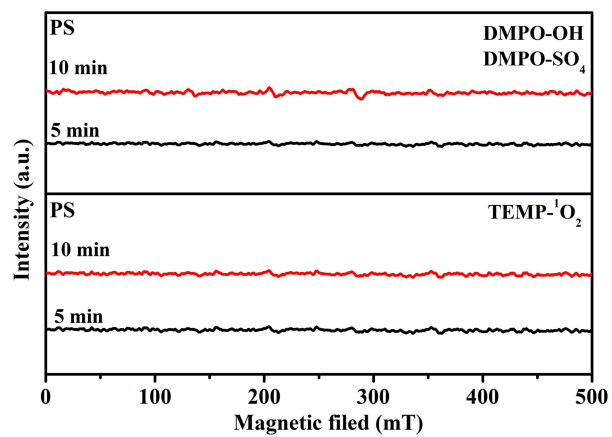

**Fig. S3.** ESR spectra of PS without CG in aqueous solution obtained using DMPO and TEMP as the spin trapping agents

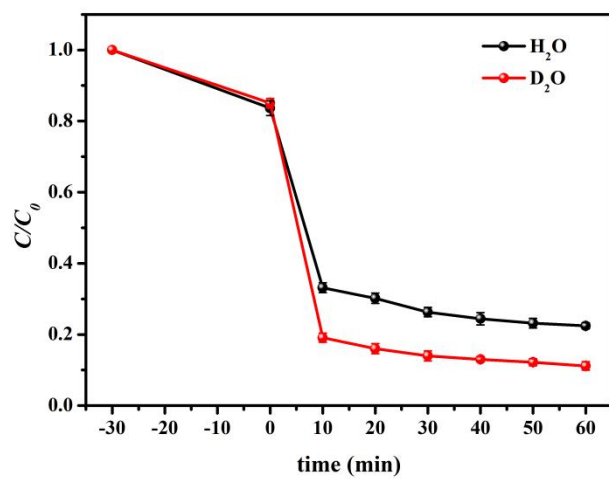

**Fig. S4.** Degradation of BPA in  $D_2O$  and  $H_2O$

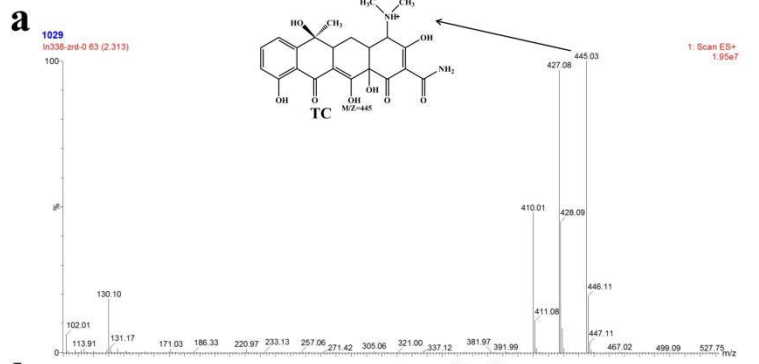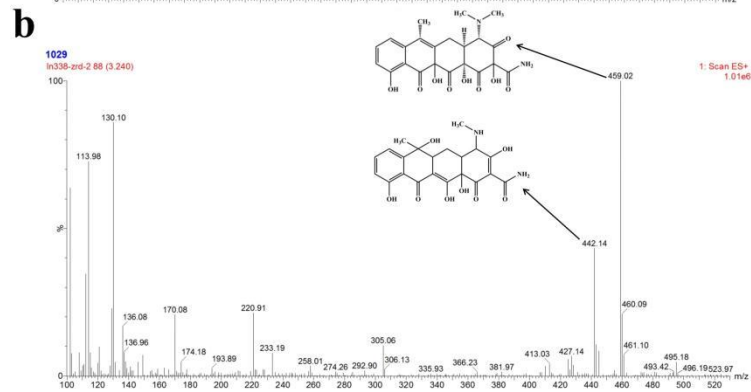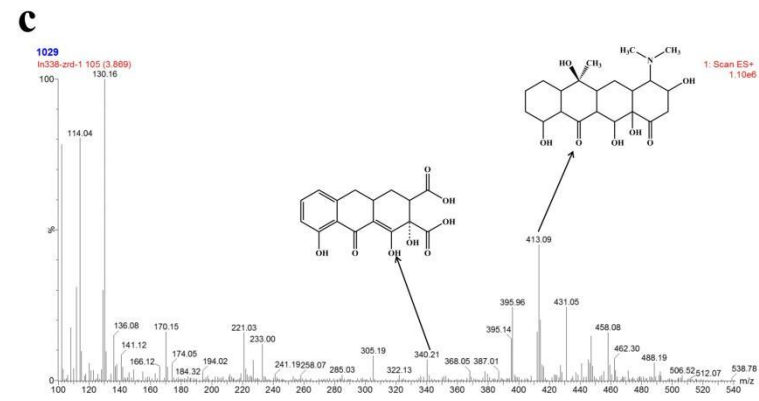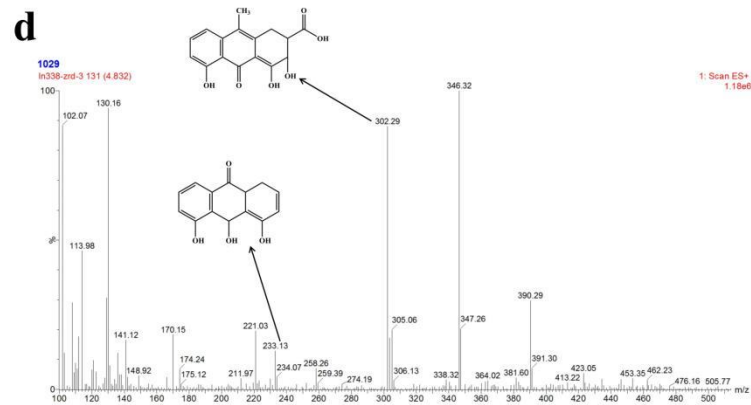

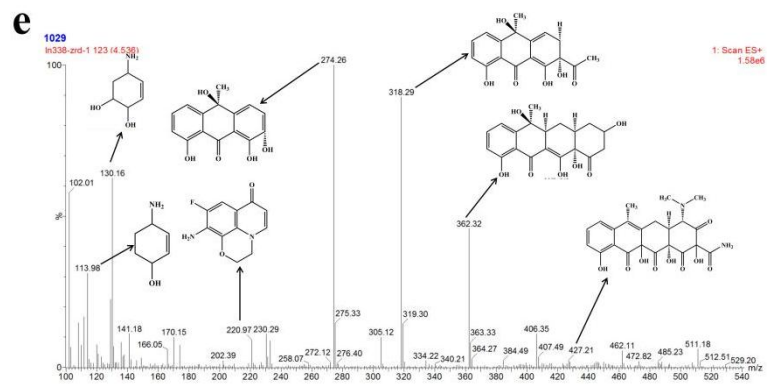

**Fig. S5.** (a-e) LC-MS spectra of the intermediates during TC degradation process



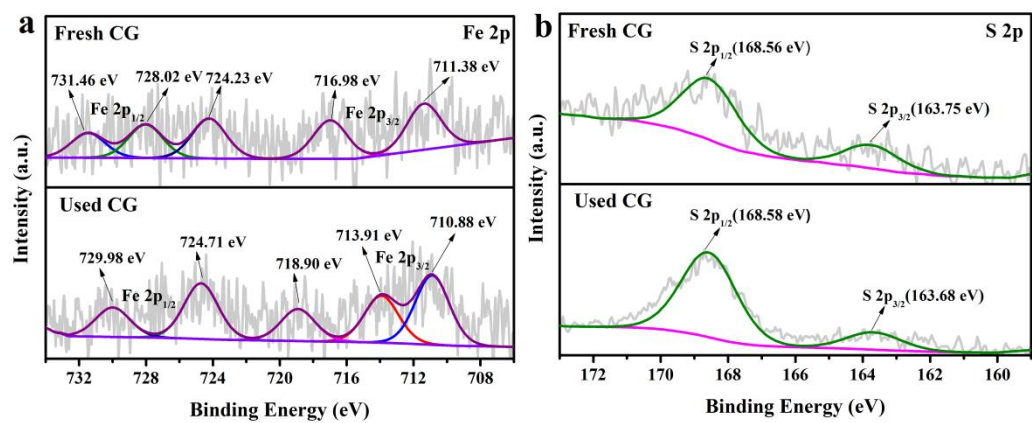

**Fig. S6.** High-resolution XPS spectra of Fe 2p (a), S 2p (b) for CG before and after catalytic reaction
